# Supplementary material for: Manganese Stress Adaptation Mechanisms of Bacillus safensis Strain ST7 From Mine Soil
Source: Front Microbiol. 2021 Nov 25;12:758889. doi: 10.3389/fmicb.2021.758889 (PMC8656422; doi:10.3389/fmicb.2021.758889)
Supplement: Supplementary file 8 [file Table_7.xlsx]

## Sheet: Sheet1
Supplementary Table S7. KAAS analysis for DEGs related with spore formation of strain ST7
No.	Gene	KAAS Path-hierarchy C	KAAS Path-hierarchy D	Protein_ID	Gene_ID	Exponential growth phase				Stationary growth phase				Gene product	Note	Feature	Effect in Sporulation
						logFC	up/down	Mean (Mn(II) presence)	Mean (control)	logFC-	up/down	Mean (Mn(II) presence)	Mean (control)
1	spo0A	C 02020 Two-component system [PATH:ko02020] C 02024 Quorum sensing [PATH:ko02024]	D WP_024422935.1; K07699 spo0A; two-component system, response regulator, stage 0 sporulation protein A	WP_024422935.1	RS11930	1.13004	Up	10371.2	4738.7	1.02863	Up	3623.04	1771.11	sporulation transcription factor Spo0A	stage 0	spo0A is master regulator of sporulation. The Spo0A protein is activated through phosphorylation. The phosphorylated Spo0A (Spo0A-P) is an active transcriptional factor that regulates a group of genes (more than 500 genes)essential for subsequent endospore formation. (Miller, 2012)	activation
2	kinA	C 02020 Two-component system [PATH:ko02020]	D WP_073208295.1; K02491 kinA; two-component system, sporulation sensor kinase A [EC:2.7.13.3]	WP_073208295.1	RS06690	0.628775	no-diff	6457.4	4175.97	1.84336	Up	3896.15	1081.5	PAS domain-containing sensor histidine kinase	kinase	In B. subtilis, Spo0A is activated by phosphorylation through a remarkable multi-component phosphorelay system of autophosphorylating histidine kinases (KinA-KinE) (POMPEO, 2016)	activation
3	kinB	C 02020 Two-component system [PATH:ko02020]	D WP_073207225.1; K07697 kinB; two-component system, sporulation sensor kinase B [EC:2.7.13.3]	WP_073207225.1	RS15865	0.697014	no-diff	3220.43	1986.09	-2.47379	Down	1090.01	6056.36	GHKL domain-containing protein	kinase
4	kinC	C 02020 Two-component system [PATH:ko02020]	D WP_024424747.1; K07698 kinC; two-component system, sporulation sensor kinase C [EC:2.7.13.3]	WP_024424747.1	RS06960	1.04376	Up	1451.07	703.42	1.22885	Up	493.849	214.375	PAS domain S-box protein	kinase
5	kbaA	C 99978 Cell growth	D WP_073203503.1; K06349 kbaA; KinB signaling pathway activation protein	WP_073203503.1	RS00960	-0.724218	no-diff	1410.99	2330.64	-3.55223	Down	41.1303	480.534	KinB-signaling pathway activation protein		kbaA active KinB	activation
6	kapD	C 99978 Cell growth	D WP_044332456.1; K06348 kapD; sporulation inhibitor KapD	WP_044332456.1	RS15875					-7.19641	Down	151.538	22225.1		regulator	KapD inhibits the KinA pathway. (Miller, 2012)	inhibition
7	kipI	C 99978 Cell growth	D WP_073203854.1; K06351 kipI; inhibitor of KinA	WP_073203854.1	RS02215	1.14338	Up	1658.32	750.689	5.01848	Up	8364.59	263.154	5-oxoprolinase subunit PxpB	regulator	KipI inhibit KinA	inhibition
8	kipA	C 99978 Cell growth	D WP_073203857.1; K06350 kipA; antagonist of KipI	WP_073203857.1	RS02220	1.14915	Up	1841.23	830.163	3.42174	Up	6111.58	575.921	biotin-dependent carboxyltransferase family protein	regulator	KipA inhibit KipI	activation
9	sinI	C 99978 Cell growth	D WP_073206269.1; K06372 sinI; antagonist of SinR	WP_073206269.1	RS12120					2.03527	Up	474.393	112.66	DNA-binding anti-repressor SinI	regulator	SinR, which is negatively regulated by SinI, the transcription of sinI is Spo0A-P-dependent.(Philips and Strauch, 2002)	activation
10	sinR	C 03000 Transcription factors [BR:ko03000]	D WP_024422969.1; K19449 sinR; XRE family transcriptional regulator, master regulator for biofilm formation	WP_024422969.1	RS12125	0.63841	no-diff	2561.9	1645.93	2.09894	Up	1201.26	276.692	transcriptional regulator SinR	regulator		inhibition
11	spo0F	C 02020 Two-component system [PATH:ko02020] C 02024 Quorum sensing [PATH:ko02024]	D WP_003214681.1; K02490 spo0F; two-component system, response regulator, stage 0 sporulation protein F	WP_003214681.1	RS18420	2.02734	Up	2810.17	689.116	-1.53648	Down	134.136	383.924	response regulator	regulator	Spo0F is two-component response regulator involved pathway leading to phosphorylation of Spo0A (Miller, 2012)	activation
12	rapA	C 02024 Quorum sensing [PATH:ko02024]	D WP_024422883.1; K06359 rapA, spo0L; response regulator aspartate phosphatase A (stage 0 sporulation protein L) [EC:3.1.-.-]	WP_024422883.1	RS11640					1.58799	Up	28818.8	9582.45		regulator	In B. subtilis, the RapA, B and E are capable of dephosphorylating Spo0F-Pi specifically, limiting the flow of phosphoryl groups through the pathway (Philips and Strauch, 2002)	inhibition
13	AbrB	C 03000 Transcription factors [BR:ko03000]	D WP_087975202.1; K06284 abrB; AbrB family transcriptional regulator, transcriptional pleiotropic regulator of transition state genes	WP_087975202.1	RS00260	1.46869	Up	3363.22	1215.27	0.997558	no-diff	4624.59	2310.5	AbrB/MazE/SpoVT family DNA-binding domain-containing protein	regulator	AbrB inhibit the cumulation of Spo0A-Pi (Philips and Strauch, 2002)	inhibition
14	AbrB	C 03000 Transcription factors [BR:ko03000]	D WP_024424746.1; K06284 abrB; AbrB family transcriptional regulator, transcriptional pleiotropic regulator of transition state genes	WP_024424746.1	RS06955					2.53816	Up	39.9189	8.19827	AbrB/MazE/SpoVT family DNA-binding domain-containing protein	regulator
15	spoVT	C 03000 Transcription factors [BR:ko03000]	D WP_024427194.1; K04769 spoVT; AbrB family transcriptional regulator, stage V sporulation protein T	WP_024427194.1	RS00355	-1.68828	Down	12200	39317.2	-2.52848	Down	40.742	231.346	stage V sporulation protein T	regulator	SpoVT is a regulator of numerous forespore specific genes dependent on SigG that are expressed at later times during sporulation (Philips, 2002).	inhibition
16	spo0E	C 99978 Cell growth	D WP_024424676.1; K06376 spo0E; stage 0 sporulation regulatory protein	WP_024424676.1	RS06535	1.09398	Up	777.168	363.949	0.116678	no-diff	1557.46	1436.46	aspartyl-phosphate phosphatase Spo0E family protein	regulator	spo0E specifically dephosphorylate Spo0A-P. Spo0A, AbrB, and Spo0E inhibiting each other in the process o initiation of sporulation (Schultz, 2016)	inhibition
17	spo0E		spo0E	WP_029707539.1	RS05280	0.598534	no-diff	1014.9	670.262	-2.98935	Down	28.0552	226.997	aspartyl-phosphate phosphatase Spo0E family protein
18	spo0E		spo0E	WP_008343814.1	RS09575	0.758496	no-diff	2519.96	1489.1	1.39634	Up	336.735	126.245	aspartyl-phosphate phosphatase Spo0E family protein
19	sigH	C 03021 Transcription machinery [BR:ko03021]	D WP_008345424.1; K03091 sigH; RNA polymerase sporulation-specific sigma factor	WP_008345424.1	RS00650	1.77675	Up	15470.9	4514.71					RNA polymerase sporulation sigma factor SigH	regulator	sigH is transcription factor. The sigH gene encodes an RNA polymerase sigma factor (SigH) that recognizes alternate promoters located upstream of spo0A and spo0F. Spo0A~P leads to increased σH levels by repression of abrB. Activated Spo0A can stimulate transcription from promoters that are either SigA- or SigH-dependent (Stephonson, 2005).	activation
20	sigH	C 03021 Transcription machinery [BR:ko03021]	D WP_007499746.1; K03091 sigH; RNA polymerase sporulation-specific sigma factor	WP_007499746.1	RS07395	1.67708	Up	3664.82	1145.8	-1.78947	Down	25.1882	85.4276	RNA polymerase sporulation sigma factor SigE	regulator
21	sigH	C 03021 Transcription machinery [BR:ko03021]	D WP_024424250.1; K03091 sigH; RNA polymerase sporulation-specific sigma factor	WP_024424250.1	RS07400	-1.89417	Down	21324.8	79266.7	-1.183	Down	86.5601	201.865	RNA polymerase sporulation sigma factor SigG	regulator
22	sigH	C 03021 Transcription machinery [BR:ko03021]	D WP_034738387.1; K03091 sigH; RNA polymerase sporulation-specific sigma factor	WP_034738387.1	RS12695	-1.18361	Down	5051.83	11475.4	-6.17021	Down	8.4425	594.91	RNA polymerase sporulation sigma factor SigK	regulator
23	spo0M	C 99978 Cell growth	D WP_073207263.1; K06377 spo0M; sporulation-control protein	WP_073207263.1	RS16120	1.21016	Up	1220.88	527.976	2.60832	Up	5186.34	849.82	sporulation protein	regulator	Spo0M is transcriptionally regulated by sigH. Disruption of the spo0M gene results in a defect in endospore formation from stage 0 to stage II. Overexpression of the Spo0M protein also negatively affects the sporulation process, indicating that both too little and too much Spo0M protein in the cells will influence the initial step of sporulation . (Sonoda-2015)
24	rsfA	C 03000 Transcription factors [BR:ko03000]	D WP_073207760.1; K06314 rsfA; prespore-specific regulator	WP_073207760.1	RS18575	-1.58241	Down	4325.57	12953.4					RsfA family transcriptional regulator	regulator	The expression of transcriptional regulator rsfA gene is dependent on both SigF and SigG. Disruption of rsfA gene had different effects on the expression of SigF-dependent genes in forespore. (Wu-2000)	activation
25	gerE	C 03000 Transcription factors [BR:ko03000]	D WP_073206862.1; K01994 gerE; LuxR family transcriptional regulator, transcriptional regulator of spore coat protein	WP_073206862.1	RS14165					-8.87558	Down	4.27199	2013.33		regulator	gerE is a small DNA-binding transcriptional regulator to control the activity of SigK and the gene expression in mother cell. (Aronson, 2018)	inhibition
26	spoIISB	C 99978 Cell growth	D WP_080652934.1; K06389 spoIISB; stage II sporulation protein SB	WP_080652934.1	RS06090					-3.11513	Down	146.646	1264.91		regulator	SpoIISB is required only to counteract the negative effect of SpoIISA on sporulation (Adler, 2001)	activation
27	maf	C 99978 Cell growth	D WP_073206682.1; K06287 maf; septum formation protein	WP_073206682.1	RS13605	1.34205	Up	1283.85	506.11	3.52539	Up	1914.23	161.502	septum formation inhibitor Maf	regulator	Maf inhibits synthesis of the division septum (Hamoen, 2011)	inhibition
28	spoIVFB	C 01002 Peptidases and inhibitors [BR:ko01002]	D WP_024423159.1; K06402 spoIVFB; stage IV sporulation protein FB [EC:3.4.24.-]	WP_024423159.1	RS13320	-1.45149	Down	1619.78	4430.47	0.87999	no-diff	229.203	129.785	stage IV sporulation protein FB	Enzyme	The translation of sigK mRNA produces an inactive precursor protein, pro-σK. Processing of pro-σK requires the protease, SpoIVFB, located in the mother cell membrane. At least two proteins located in the mother cell (SpoIVFA and BofA) negatively regulate the activity of SpoIVFB. Additional regulators, BofC and SpoIVB in the forespore overcome the inhibitory effects of SpoIVFA and BofA and ultimat…	activation
29	spoIVFA	C 99978 Cell growth	D WP_073206525.1; K06401 spoIVFA; stage IV sporulation protein FA	WP_073206525.1	RS13325	-1.95847	Down	2482.79	9650.15					M23 family metallopeptidase	regulator		inhibition
30	bofA	C 99978 Cell growth	D WP_024425765.1; K06317 bofA; inhibitor of the pro-sigma K processing machinery	WP_024425765.1	RS00165	-1.65133	Down	337.317	1060.29	-2.77528	Down	29.9413	200.875	pro-sigmaK processing inhibitor BofA	regulator		inhibition
31	bofC	C 99978 Cell growth	D WP_044331597.1; K06318 bofC; forespore regulator of the sigma-K checkpoint	WP_044331597.1	RS13225	-1.17925	Down	6341.79	14360.8	-2.32822	Down	16.2467	83.5867	intercompartmental signaling factor BofC	regulator		activation
32	spoIVB	C 01002 Peptidases and inhibitors [BR:ko01002]	D WP_025092993.1; K06399 spoIVB; stage IV sporulation protein B [EC:3.4.21.116]	WP_025092993.1	RS11935	-1.01495	Down	26155.9	52857.1	-3.94791	Down	64.8301	1006.6	SpoIVB peptidase	regulator		activation
33	spoIIID	C 03000 Transcription factors [BR:ko03000]	D WP_008343327.1; K06283 spoIIID; putative DeoR family transcriptional regulator, stage III sporulation protein D	WP_008343327.1	RS18130	-1.48347	Down	19655.3	54960.1					sporulation transcriptional regulator SpoIIID	regulator	The transcription of spoIVCA and subsequent transcription of the intact sigK gene is directed by σE and a regulatory protein SpoIIID in mother cell. (Miller, 2012)	inhibition
34	jag	C 99978 Cell growth	D WP_073208220.1; K06346 jag; spoIIIJ-associated protein	WP_073208220.1	RS20270	1.7162	Up	2617.12	796.562					protein jag	binding protein	jag is SpoIIIJ-associated RNA/ssDNA-binding protein. spoIIIJ is translocase and essential for activation of σG in forespore (Miller, 2012)	activation
35	yknT	C 99978 Cell growth	D WP_073205011.1; K06437 yknT; sigma-E controlled sporulation protein	WP_073205011.1	RS06855	-1.8008	Down	3937.73	13718	-2.13424	Down	32.5306	147.036	sigmaE regulated sporulation protein	regulator
36	spoIIB	C 99978 Cell growth	D WP_051170125.1; K06380 spoIIB; stage II sporulation protein B	WP_051170125.1	RS13610	2.07714	Up	4778.97	1132.44	-1.21297	Down	29.137	66.9934	SPOR domain-containing protein	stage II	SpoIIB and SpoIIQ function during engulfment in B. subtilis (Miller, 2012)
37	spoIIQ	C 99978 Cell growth	D WP_034281210.1; K06386 spoIIQ; stage II sporulation protein Q	WP_034281210.1	RS18180	-1.67251	Down	34890.8	111221					peptidoglycan DD-metalloendopeptidase family protein	stage II
38	spoIID	C 99978 Cell growth	D WP_073207712.1; K06381 spoIID; stage II sporulation protein D	WP_073207712.1	RS18240	-2.07877	Down	6383.38	26967.2					stage II sporulation protein D	stage II	spoIID is autolysin required for complete dissolution of the sporulation septum. (Miller, 2012)
39	spoIIM	C 99978 Cell growth	D WP_024422873.1; K06384 spoIIM; stage II sporulation protein M	WP_024422873.1	RS11590	-0.544938	no-diff	644.281	939.105	-5.0132	Down	1.84946	56.0465	stage II sporulation protein M	stage II	spoIIM is autolysin for dissolution of the septal cell wall (Miller, 2012)
40	spoIIP	C 99978 Cell growth	D WP_024427950.1; K06385 spoIIP; stage II sporulation protein P	WP_024427950.1	RS12590	-1.53076	Down	2134.02	6166.07	-1.46085	Down	17.2916	44.893	stage II sporulation protein P	stage II	spoIIP is spore autolysin
41	cgeA	C 99978 Cell growth	D WP_024422714.1; K06319 cgeA; spore maturation protein CgeA	WP_024422714.1	RS10630	-1.98311	Down	4838.95	19130.8	-11.996	Down	315.651	1.28852e+06	hypothetical protein	spore coat protein	cgeA located in the outermost layer of the spore coat (Japan, 2013), The outermost layer, the crust, is a postulated glycoprotein layer that is composed of six proteins: CotV, W, X, Y, Z and CgeA (Bartels, 2019)	structure protein in coat
42	cotV	C 99978 Cell growth	D WP_073204750.1; K06340 cotV; spore coat protein V	WP_073204750.1	RS05785					-11.2633	Down	133.913	328762		spore coat protein
43	cotW	C 99978 Cell growth	D WP_024425013.1; K06341 cotW; spore coat protein W	WP_024425013.1	RS05780					-11.0873	Down	46.8449	101380		spore coat protein
44	cotX	C 99978 Cell growth	D WP_025093420.1; K06342 cotX; spore coat protein X	WP_025093420.1	RS05775					-10.9577	Down	872.442	1.73488e+06		spore coat protein
45	cotY	C 99978 Cell growth	D WP_003211658.1; K06343 cotY; spore coat protein Y	WP_003211658.1	RS05770					-11.2029	Down	411.468	969448		spore coat protein
46	cotZ	C 99978 Cell growth	D WP_024425015.1; K06344 cotZ; spore coat protein Z	WP_024425015.1	RS05765					-10.3399	Down	234.982	304355		spore coat protein
47	cgeB	C 99978 Cell growth	D WP_073205979.1; K06320 cgeB; spore maturation protein CgeB	WP_073205979.1	RS10635	-1.48844	Down	6398.87	17954.6	-11.8385	Down	751.492	2.75149e+06	glycosyltransferase	spore maturation protein	CgeB, CgeCDE, SpsA-L, SpsM and SpsNOPQR (formerly YfnHGFED) contribute to the glycosylation state of the spore (Bartels, 2019)	glycosylation
48	cgeC	C 99978 Cell growth	D WP_024422713.1; K06321 cgeC; spore maturation protein CgeC	WP_024422713.1	RS10625	-2.92304	Down	113.566	862.052	-12.5179	Down	35.9427	209585	hypothetical protein	spore maturation protein
49	cgeD	C 99978 Cell growth	D WP_073205976.1; K06322 cgeD; spore maturation protein CgeD	WP_073205976.1	RS10620	-2.95277	Down	766.468	5935.67	-11.2607	Down	251.949	617645	glycosyltransferase family 2 protein	spore maturation protein
50	spsF	C 99978 Cell growth	D WP_073207806.1; K07257 spsF; spore coat polysaccharide biosynthesis protein SpsF	WP_073207806.1	RS18745	-1.49559	Down	3056.26	8618.63	-10.7048	Down	120.94	201736	glycosyltransferase family protein	spore coat protein
51	cotD	C 99978 Cell growth	D WP_073206049.1; K06327 cotD; spore coat protein D	WP_073206049.1	RS10915	-2.43108	Down	4863.93	26232	-7.38029	Down	1135.27	189149	spore coat protein	spore coat protein	CotD is coat protein. (Bartels, 2019)	structure protein in coat
52	cotD	C 99978 Cell growth	D WP_073206394.1; K06327 cotD; spore coat protein D	WP_073206394.1	RS12760	-0.874814	no-diff	1059.16	1941.85	-11.7429	Down	180.85	619595	hypothetical protein	spore coat protein
53	cotE	C 99978 Cell growth	D WP_024424105.1; K06328 cotE; spore coat protein E	WP_024424105.1	RS08325	-1.85426	Down	42579.3	153953	-8.39687	Down	8.64569	2920.88	outer spore coat protein CotE	spore coat protein	CotE directs the assembly of a large subset of coat proteins, including most or all of the outer coat proteins. (Kodama-2011)	direct the assembly of coat proteins
54	cotH	C 99978 Cell growth	D WP_073204632.1; K06330 cotH; spore coat protein H	WP_073204632.1	RS05285					-8.13496	Down	3.53221	1011.04		spore coat protein	CotH, one of the so-called CotE controlled proteins, directs the assembly of an important subset of coat proteins, including CotG. (Kodama, 2011)
55	yabG	C 99978 Cell growth	D WP_024427198.1; K06436 yabG; spore coat assemly protein	WP_024427198.1	RS00290					-7.22594	Down	24.5968	3698.36		spore coat protein	YabG is sporulation-specific protease and transcribed by SigK-containing RNA polymerase and involved in the proteolysis and maturation of SpoIVA and YrbA proteins, conserved with the cortex and/or coat assembly by B. subtilis (Miller, 2012)
56	cotM	C 99978 Cell growth	D WP_024425138.1; K06335 cotM; spore coat protein M	WP_024425138.1	RS09595					-7.64426	Down	28.3879	5657.39		spore coat protein	CotM is present in many Bacilli and some Clostridia (Henriques and Moran 2007). In B. subtilis, it is under SigK control and negatively regulated by GerE (Henriques, Beall and Moran 1997). It is located under the outer coat of spore (Arthur Aronson, 2018)	structure protein in coat
57	cotA MCO	C 99980 Enzymes with EC numbers	D WP_073204075.1; K06324 cotA; spore coat protein A, manganese oxidase [EC:1.16.3.3]	WP_073204075.1	RS03010	1.71506	Up	7927.58	2414.67	-6.11337	Down	160.979	11144.3	multicopper oxidase domain-containing protein	Enzyme		Oxidation of Mn(II)
58	spmA	C 99978 Cell growth	D WP_024422844.1; K06373 spmA; spore maturation protein A	WP_024422844.1	RS11415	-1.76974	Down	1711.95	5837.88	-3.3231	Down	17.0234	174.995	spore maturation protein	spore cortex protein	the loss of heat resistance is partially due to a lack of expression of spmA and spmB in the spore cortex (Popham, 1995).	structure protein in cortex
59	spmB	C 99978 Cell growth	D WP_024422843.1; K06374 spmB; spore maturation protein B	WP_024422843.1	RS11410	-1.84295	Down	1760.21	6315.29	-2.90176	Down	18.9746	145.471	spore maturation protein	spore cortex protein
60	coxA	C 99978 Cell growth	D WP_024423149.1; K06345 coxA; spore cortex protein	WP_024423149.1	RS13250	-0.815921	no-diff	18762.9	33031	-7.56851	Down	55.5094	10536.7	spore cortex protein	spore cortex protein	没有查到	structure protein in cortex
61	spoIIIAA	C 99978 Cell growth	D WP_073206257.1; K06390 spoIIIAA; stage III sporulation protein AA	WP_073206257.1	RS12035	-1.86539	Down	4210.78	15343.4	-3.57019	Down	14.0276	167.12	stage III sporulation protein AA	stage III	stage III sporulation engulfment assembly protein/mother cell signalling for σG activation (Miller, 2012)	strucutre protein in spore
62	spoIIIAB	C 99978 Cell growth	D WP_024428003.1; K06391 spoIIIAB; stage III sporulation protein AB	WP_024428003.1	RS12030	-1.72983	Down	1274.74	4228.87					stage III sporulation protein SpoAB	stage III
63	spoIIIAC	C 99978 Cell growth	D WP_003153142.1; K06392 spoIIIAC; stage III sporulation protein AC	WP_003153142.1	RS12025	-1.64982	Down	167.469	526.253					stage III sporulation protein AC	stage III
64	spoIIIAD	C 99978 Cell growth	D WP_026050110.1; K06393 spoIIIAD; stage III sporulation protein AD	WP_026050110.1	RS12020	-1.95557	Down	608.692	2361.55	-7.42162	Down	0	17.5339	stage III sporulation protein AD	stage III
65	spoIIIAE	C 99978 Cell growth	D WP_024422950.1; K06394 spoIIIAE; stage III sporulation protein AE	WP_024422950.1	RS12015	-1.00182	Down	936.27	1874.73					stage III sporulation protein AE	stage III
66	spoIIIAF	C 99978 Cell growth	D WP_024422949.1; K06395 spoIIIAF; stage III sporulation protein AF	WP_024422949.1	RS12010	-2.00784	Down	2455.44	9876.07					stage III sporulation protein AF	stage III
67	spoIIIAG	C 99978 Cell growth	D WP_073206254.1; K06396 spoIIIAG; stage III sporulation protein AG	WP_073206254.1	RS12005	-2.2343	Down	3367.67	15846.9					stage III sporulation protein AG	stage III
68	spoIIIAH	C 99978 Cell growth	D WP_024428006.1; K06397 spoIIIAH; stage III sporulation protein AH	WP_024428006.1	RS12000	-2.11983	Down	9407.9	40891.7	-1.89244	Down	13.8242	48.5821	SpoIIIAH-like family protein	stage III
69	spoVD	C 00550 Peptidoglycan biosynthesis [PATH:ko00550]	D WP_024424263.1; K08384 spoVD; stage V sporulation protein D (sporulation-specific penicillin-binding protein)	WP_024424263.1	RS07320	-2.11858	Down	9691.14	42086.3	-2.23367	Down	62.0003	295.983	stage V sporulation protein D	stage IV	SpoVD is known to be essential for endospore cortex synthesis (Sidarta, 2018)	activation
70	safA	C 99978 Cell growth	D WP_073206510.1; K06370 safA; morphogenetic protein associated with SpoVID	WP_073206510.1	RS13255	-1.96214	Down	86425.8	336749	-4.92048	Down	43.2386	1317.95	SafA/ExsA family spore coat assembly protein	stage IV	safA is dependent on SigE in mother cell, which is structure protein located in the inner coat of developing forespore. (Japna, 2013)	structure protein in coat
71	spoIVA	C 99978 Cell growth	D WP_008344534.1; K06398 spoIVA; stage IV sporulation protein A	WP_008344534.1	RS11215	-2.16224	Down	133193	596185	-6.84885	Down	85.8296	9906.31	stage IV sporulation protein A	stage IV	spoIVA is morphogenetic protein required for proper spore cortex formation and coat assembly (Miller, 2012)	structure protein in spore
72	spoIVCA	C 99978 Cell growth	D WP_073206676.1; K06400 spoIVCA; site-specific DNA recombinase	WP_073206676.1	RS13595						Up	0.369891	0		Enzyme	SpoIVCA is a site-specific recombinase protein, which excises the skin element sequences located in sigK reading frame to generate an uninterrupted sigK gene. The sigK gene encoded SigK, whose activity is restricted to the mother cell. (Miller, 2012)	activation
73	spoIVCA	C 99978 Cell growth	D WP_035701812.1; K06400 spoIVCA; site-specific DNA recombinase	WP_035701812.1	RS13875		Up	0.520869	0					recombinase family protein	Enzyme
74	yqfD	C 99978 Cell growth	D WP_024427959.1; K06438 yqfD; similar to stage IV sporulation protein	WP_024427959.1	RS12500	-1.355	Down	3007.86	7694.44	-1.42694	Down	21.2585	53.9285	sporulation protein YqfD	stage IV	yqfD is stage IV sporulation protein (Miller, 2012)	structure protein in spore
75	spoVB	C 02000 Transporters [BR:ko02000]	D WP_073204967.1; K06409 spoVB; stage V sporulation protein B	WP_073204967.1	RS06610	-1.30545	Down	1628.95	4026.36	-3.33105	Down	6.75953	68.5644	polysaccharide biosynthesis protein	Enzyme	function in spore cortex synthesis (Miller, 2012)	activation
76	spoVB	C 02000 Transporters [BR:ko02000]	D WP_056767987.1; K06409 spoVB; stage V sporulation protein B	WP_056767987.1	RS13180	-1.90605	Down	3590.06	13455.4	-4.56265	Down	13.3619	321.801	stage V sporulation protein B	Enzyme
77	spoVAA	C 99978 Cell growth	D WP_073206174.1; K06403 spoVAA; stage V sporulation protein AA	WP_073206174.1	RS11540	-1.43663	Down	3919.44	10609.9	-1.13706	Down	12.6774	26.9326	stage V sporulation protein AA	stage V	This proteins increase dipicolinic acid uptake by the developing spore (Miller, 2012)	activation
78	spoVAB	C 99978 Cell growth	D WP_024422862.1; K06404 spoVAB; stage V sporulation protein AB	WP_024422862.1	RS11535	-1.49966	Down	847.06	2395.75					stage V sporulation protein AB	stage V
79	spoVAC	C 99978 Cell growth	D WP_024422861.1; K06405 spoVAC; stage V sporulation protein AC	WP_024422861.1	RS11530	-1.46051	Down	1492.4	4107.79	-5.84392	Down	0	5.9236	stage V sporulation protein AC	stage V
80	spoVAD	C 99978 Cell growth	D WP_024428061.1; K06406 spoVAD; stage V sporulation protein AD	WP_024428061.1	RS11525	-1.58992	Down	4658.71	14024.8	-2.93957	Down	5.11348	42.1688	stage V sporulation protein AD	stage V
81	spoVAE	C 99978 Cell growth	D WP_024422859.1; K06407 spoVAE; stage V sporulation protein AE	WP_024422859.1	RS11515	-1.55186	Down	1446.32	4241.18					stage V sporulation protein AE	stage V
82	spoVAE	C 99978 Cell growth	D WP_024422860.1; K06407 spoVAE; stage V sporulation protein AE	WP_024422860.1	RS11520	-1.49329	Down	852.821	2401.52					stage V sporulation protein AE	stage V
83	spoVAF	C 99978 Cell growth	D WP_145925721.1; K06408 spoVAF; stage V sporulation protein AF	WP_145925721.1	RS11510	-1.46489	Down	6498.57	17939.4					spore germination protein	stage V
84	spoVFA	C 99978 Cell growth	D WP_073205210.1; K06410 spoVFA; dipicolinate synthase subunit A	WP_073205210.1	RS08160					-10.901	Down	24.9298	47570.1		stage V	encode spore dipicolinate synthase subunit A and B (Miller, 2012)
85	spoVFB	C 99978 Cell growth	D WP_024427009.1; K06411 spoVFB; dipicolinate synthase subunit B	WP_024427009.1	RS08165					-11.571	Down	13.787	41441.5		stage V
86	spoVG	C 99978 Cell growth	D WP_008357439.1; K06412 spoVG; stage V sporulation protein G	WP_008357439.1	RS00320	1.42476	Up	17693.3	6590.56					septation protein SpoVG	stage V	In B. subtilis, SpoVG negatively regulates asymmetric septum formation and positively regulates cortex formation (Chen, 2020)
87	spoVK	C 99978 Cell growth	D WP_073205264.1; K06413 spoVK; stage V sporulation protein K	WP_073205264.1	RS08460	-2.0135	Down	4252.37	17170.2	-5.02522	Down	21.4988	697.784	AAA family ATPase	stage V
88	spoVR	C 99978 Cell growth	D WP_024425292.1; K06415 spoVR; stage V sporulation protein R	WP_024425292.1	RS04710	-2.17483	Down	11408	51511.6	4.91927	Up	8786.24	285.38	SpoVR family protein	stage V	spore cortex synthesis (Miller, 2012)	activation
89	spoVS	C 99978 Cell growth	D WP_003211281.1; K06416 spoVS; stage V sporulation protein S	WP_003211281.1	RS08290	-1.7004	Down	21837.7	70971.2	0.892267	no-diff	895.755	487.791	stage V sporulation protein SpoVS	stage V	The regulator is required for dehydration of the spore core and assembly of the coat (Miller, 2012)	activation
90	spoVID	C 99978 Cell growth	D WP_073206706.1; K06417 spoVID; stage VI sporulation protein D	WP_073206706.1	RS13665	-1.98987	Down	42169.8	167499	-4.39581	Down	47.4365	993.79	LysM peptidoglycan-binding domain-containing protein	stage V	SpoVID is required for attachment of the coat to the forespore (Kodama-2011)	structure protein in spore
91	gerAA	C 99978 Cell growth	D WP_073207371.1; K06288 gerAA; spore germination protein AA	WP_073207371.1	RS16575	-1.31132	Down	1012.26	2512.45	2.48284	Up	368.6	62.5072	spore germination protein	spore germination protein	gerAB, gerAA, gerAC are components of the germination receptor GerA and regulated by SigF and SigG (Miller, 2012). The function of specific receptors (including GerA,GerB,and GerK) is to detect nutrients outside of spores (Miller, 2012)	signalling from outside of spore
92	gerAB	C 02000 Transporters [BR:ko02000]	D WP_073207374.1; K06289 gerAB; spore germination protein AB	WP_073207374.1	RS16580	-0.990944	no-diff	653.343	1298.7	2.14674	Up	389.349	89.1167	endospore germination permease	spore germination protein
93	gerAC	C 99978 Cell growth	D WP_073207378.1; K06290 gerAC; spore germination protein AC	WP_073207378.1	RS16585	-0.851215	no-diff	824.373	1487.62	2.07427	Up	372.456	83.7762	Ger(x)C family spore germination protein	spore germination protein
94	gerBA	C 99978 Cell growth	D WP_024423661.1; K06291 gerBA; spore germination protein BA	WP_024423661.1	RS17930	-1.33712	Down	1190.68	3007.71	-5.50031	Down	35.1012	1597.07	spore germination protein	spore germination protein	gerBA, gerBB, gerBC are components of the germination receptor GerB and regulated by SigG (Miller, 2012)
95	gerBB	C 02000 Transporters [BR:ko02000]	D WP_024423662.1; K06292 gerBB; spore germination protein BB	WP_024423662.1	RS17935	-1.39477	Down	274.445	721.499	-9.17106	Down	1.21138	693.729	GerAB/ArcD/ProY family transporter	spore germination protein
96	gerBC	C 99978 Cell growth	D WP_073207650.1; K06293 gerBC; spore germination protein BC	WP_073207650.1	RS17940	-1.73986	Down	15.042	50.5368	-5.84392	Down	0	5.9236	Ger(x)C family spore germination protein	spore germination protein
97	gerKA	C 99978 Cell growth	D WP_029707078.1; K06295 gerKA; spore germination protein KA	WP_029707078.1	RS10100	-1.10182	Down	3535.19	7587.22	3.81061	Up	286.127	17.06	spore germination protein	spore germination protein	spore germination receptor subunit (Miller, 2012)
98	gerKA	C 99978 Cell growth	D WP_073207662.1; K06295 gerKA; spore germination protein KA	WP_073207662.1	RS17985	-1.40086	Down	1477.26	3900.68	1.87924	Up	44.2833	12.4073	spore germination protein	spore germination protein
99	gerKC	C 99978 Cell growth	D WP_025093922.1; K06297 gerKC; spore germination protein KC	WP_025093922.1	RS17995	-1.39474	Down	1171.13	3079.5	-2.08922	Down	25.0591	102.811	Ger(x)C family spore germination protein	spore germination protein
100	gerD	C 99978 Cell growth	D WP_024425617.1; K06294 gerD; spore germination protein D	WP_024425617.1	RS00955	-0.994581	no-diff	6375.87	12704.2	2.25077	Up	2008.33	416.388	hypothetical protein	spore germination protein		structure protein in spore
101	gerM	C 99978 Cell growth	D WP_024423204.1; K06298 gerM; germination protein M	WP_024423204.1	RS13855	-2.01323	Down	13273.5	53583.8	-2.62073	Down	46.8818	286.067	sporulation protein	spore germination protein
102	gerPA	C 99978 Cell growth	D WP_024425506.1; K06299 gerPA; spore germination protein PA	WP_024425506.1	RS05275					-4.92579	Down	28.9243	869.627		spore germination protein	All of protein are spore germination protiens within the inner coat. (Ghosh, 2018)	structure protein in coat
103	gerPA	C 99978 Cell growth	D WP_024423331.1; K06299 gerPA; spore germination protein PA	WP_024423331.1	RS16040					-8.608	Down	9.28377	3620.66		spore germination protein
104	gerPA	C 99978 Cell growth	D WP_024423332.1; K06299 gerPA; spore germination protein PA	WP_024423332.1	RS16045					-6.42329	Down	253.522	21765.3		spore germination protein
105	gerPB	C 99978 Cell growth	D WP_003210877.1; K06300 gerPB; spore germination protein PB	WP_003210877.1	RS05270					-6.08966	Down	36.4698	2477.3		spore germination protein
106	gerPC	C 99978 Cell growth	D WP_024425505.1; K06301 gerPC; spore germination protein PC	WP_024425505.1	RS05265					-4.01666	Down	203.774	3292.53		spore germination protein
107	gerPD	C 99978 Cell growth	D WP_003210893.1; K06302 gerPD; spore germination protein PD	WP_003210893.1	RS05260					-2.19109	Down	47.6771	220.922		spore germination protein
108	gerPE	C 99978 Cell growth	D WP_073204629.1; K06303 gerPE; spore germination protein PE	WP_073204629.1	RS05255					-3.54441	Down	305.665	3562.63		spore germination protein
109	gerPF	C 99978 Cell growth	D WP_003211468.1; K06304 gerPF; spore germination protein PF	WP_003211468.1	RS05250					-3.39861	Down	61.612	656.544		spore germination protein
110	gpr	C 01002 Peptidases and inhibitors [BR:ko01002]	D WP_073206360.1; K06012 gpr; spore protease [EC:3.4.24.78]	WP_073206360.1	RS12595	-1.9056	Down	2988.8	11198.7	-1.73397	Down	22.2019	77.3399	GPR endopeptidase	Enzyme	gpr is germination protease (Miller, 2012)
111	gerQ	C 99978 Cell growth	D WP_024426405.1; K06305 gerQ; spore germination protein Q	WP_024426405.1	RS18780	-1.67021	Down	41697.7	132707	-4.88772	Down	24.3655	730.149	spore coat protein GerQ	spore germination protein		structure protein in coat
112	yaaH	C 99978 Cell growth	D WP_073203425.1; K06306 yaaH; spore germination protein	WP_073203425.1	RS00125	-1.71901	Down	5250.35	17285.3	-1.20851	Down	227.63	529.888	LysM peptidoglycan-binding domain-containing protein	Enzyme	yaaH is SigE-dependent protein and expressed in mother cell. It is spore peptidoglycan hydrolase and required for L-alanine germination.(Miller, 2012)
113	ypeB	C 99978 Cell growth	D WP_024422822.1; K06313 ypeB; spore germination protein	WP_024422822.1	RS11290	-1.608	Down	9090.65	27711.5	-2.00207	Down	28.0921	112.597	germination protein YpeB	spore germination protein	ypeB is spore membrane component (Miller, 2012)	structure protein in spore
114	SASP-A	C 99978 Cell growth	D WP_024424829.1; K06418 SASP-A, sspA; small acid-soluble spore protein A (major alpha-type SASP)	WP_024424829.1	RS14680	-1.69603	Down	209586	679078	-3.44063	Down	89.7412	977.781	alpha/beta-type small acid-soluble spore protein	binding protein	These small acid-soluble spore proteins are involved in DNA protection during spore germination (Miller, 2012)
115	SASP-B	C 99978 Cell growth	D WP_024425744.1; K06419 SASP-B, sspB; small acid-soluble spore protein B (major beta-type SASP)	WP_024425744.1	RS04855	-1.61844	Down	99421.3	305267	-3.69977	Down	22.2386	292.722	alpha/beta-type small acid-soluble spore protein	binding protein
116	sspD	C 99978 Cell growth	D WP_024424662.1; K06421 sspD; small acid-soluble spore protein D (minor alpha/beta-type SASP)	WP_024424662.1	RS06460	-1.07955	Down	10210.7	21579.5					alpha/beta-type small acid-soluble spore protein	binding protein
117	sspE	C 99978 Cell growth	D WP_012009334.1; K06422 sspE; small acid-soluble spore protein E (minor gamma-type SASP)	WP_012009334.1	RS04210	-1.43709	Down	68430.8	185293	-2.3251	Down	117.602	584.159	gamma-type small acid-soluble spore protein	binding protein
118	sspF	C 99978 Cell growth	D WP_017366434.1; K06423 sspF; small acid-soluble spore protein F (minor alpha/beta-type SASP)	WP_017366434.1	RS00300	-0.879621	no-diff	12558.9	23107.5	-5.24997	Down	323.374	12312.3	small, acid-soluble spore protein, alpha/beta type	binding protein
119	sspI	C 99978 Cell growth	D WP_024425725.1; K06426 sspI; small acid-soluble spore protein I (minor)	WP_024425725.1	RS14310	-1.42386	Down	3120.69	8373.42					small acid-soluble spore protein SspI	binding protein
120	sspJ	C 99978 Cell growth	D WP_024423454.1; K06427 sspJ; small acid-soluble spore protein J (minor)	WP_024423454.1	RS16755	-1.35111	Down	4384.6	11186	4.29587	Up	77.1008	5.9236	small, acid-soluble spore protein, SspJ family	binding protein
121	sspK	C 99978 Cell growth	D WP_003217849.1; K06428 sspK; small acid-soluble spore protein K (minor)	WP_003217849.1	RS04145	-0.752963	no-diff	5924.2	9984.12	-4.00871	Down	12.7886	211.5	small, acid-soluble spore protein K	binding protein
122	sspL	C 99978 Cell growth	D WP_003215584.1; K06429 sspL; small acid-soluble spore protein L (minor)	WP_003215584.1	RS10835	-1.41437	Down	1295.36	3453.28	-1.54101	Down	24.1345	73.0045	hypothetical protein	binding protein
123	sspM	C 99978 Cell growth	D WP_024422772.1; K06430 sspM; small acid-soluble spore protein M (minor)	WP_024422772.1	RS10960	-1.82868	Down	731.652	2599.5	-6.04785	Down	0.94319	68.8817	spore protein	binding protein
124	sspN	C 99978 Cell growth	D WP_008357830.1; K06431 sspN; small acid-soluble spore protein N (minor)	WP_008357830.1	RS09625	-1.26687	Down	639.613	1539.71	-6.55441	Down	1.34051	114.035	acid-soluble spore protein N	binding protein
125	sspO	C 99978 Cell growth	D WP_034283440.1; K06432 sspO, cotK; small acid-soluble spore protein O (minor)	WP_034283440.1	RS09605	-0.856847	no-diff	896.716	1624.43	-9.50529	Down	0	72.0567	small acid-soluble spore protein O	binding protein
126	sspP	C 99978 Cell growth	D WP_003211331.1; K06433 sspP, cotL; small acid-soluble spore protein P (minor)	WP_003211331.1	RS09600	-0.738414	no-diff	1116.85	1863.69	-6.68436	Down	1.34051	131.713	small acid-soluble spore protein P	binding protein
127	tlp	C 99978 Cell growth	D WP_024425142.1; K06434 tlp; small acid-soluble spore protein (thioredoxin-like protein)	WP_024425142.1	RS09630	-1.47474	Down	1537.78	4274.59	-4.43667	Down	3.06083	64.0381	small acid-soluble spore protein Tlp	binding protein
128	splA	C 03000 Transcription factors [BR:ko03000]	D WP_044331928.1; K06315 splA; transcriptional regulator of the spore photoproduct lyase operon	WP_044331928.1	RS06655	-1.5344	Down	553.573	1603.45	-1.96439	Down	9.99613	41.9089	transcriptional regulator	regulator	splA is regulator related with UV resistance of spore (Fajardo-Cavazos et al, 2000)	resistance of spore (UV)
129	splB	C 99980 Enzymes with EC numbers	D WP_073204977.1; K03716 splB; spore photoproduct lyase [EC:4.1.99.14]	WP_073204977.1	RS06660	-1.68397	Down	6338.14	20365.9	-1.22877	Down	65.8471	159.136	spore photoproduct lyase	regulator	splB is DNA repair enzyme, spore photoproduct lyase (Miller, 2012)	resistance of spore (UV)
KAAS analysis for DEGs related with activity of SigB
No.	Gene	KAAS Path-hierarchy C	KAAS Path-hierarchy D	Protein_ID	Gene_ID	Exponential growth phase				Stationary growth phase				Gene product	Note	Feature	Effect in SigB
						logFC	up/down	Mean (Mn(II) presence)	Mean (control)	logFC-	up/down	Mean (Mn(II) presence)	Mean (control)
1	sigB	C 03021 Transcription machinery [BR:ko03021]	D WP_024425394.1; K03090 sigB; RNA polymerase sigma-B factor	WP_024425394.1	RS02540	0.648315	no-diff	12991.7	8289.02	1.51066	Up	4234.2	1486	RNA polymerase sigma factor SigB		The increased Mn(II) induces the SigB regulon in B. subtilis (Guedon et al, 2003).
2	rsbW	C 01001 Protein kinases [BR:ko01001]	D WP_024425393.1; K04757 rsbW; serine/threonine-protein kinase RsbW [EC:2.7.11.1]	WP_024425393.1	RS02535	0.512124	no-diff	6505.41	4561.52	0.606142	no-diff	1310.19	860.734	anti-sigma B factor RsbW	regulator	RsbW is anti-sigma factor and RsbV is anti-sigma antagonist. RsbU is activator of RsbV. The activity of SigB is directly regulated by RsbW. In response to stress, RsbV interacts with RsbW thereby releasing SigB. Dephosphorylation of RsbV by either of two PP2C phosphatases (RsbU or RsbP) results in activation of the SigB response (Guedon et al, 2003)	inhibition
3	rsbU	C 03021 Transcription machinery [BR:ko03021]	D WP_024425391.1; K07315 rsbU_P; phosphoserine phosphatase RsbU/P [EC:3.1.3.3]	WP_024425391.1	RS02525	0.965979	no-diff	2110.9	1080.61	1.22564	Up	1897.35	817.339	PP2C family protein-serine/threonine phosphatase	Enzyme		activation
4	rsbS	C 03021 Transcription machinery [BR:ko03021]	D WP_003214235.1; K17762 rsbS; rsbT antagonist protein RsbS	WP_003214235.1	RS02515	0.72036	no-diff	756.383	459.157	0.745809	no-diff	277.462	160.365	RsbT antagonist protein RsbS	regulator	Antagonist of RsbT and SigB in B. subtilis (Rodriguez Ayala et al, 2020)	inhibition
5	rsbT	C 01001 Protein kinases [BR:ko01001]	D WP_073203956.1; K17752 rsbT; serine/threonine-protein kinase RsbT [EC:2.7.11.1]	WP_073203956.1	RS02520	0.905425	no-diff	1076.46	574.764	1.25452	Up	1017.42	420.833	anti-sigma regulatory factor	regulator	Activator of RsbU and SigB in B. subtilis (Rodriguez Ayala et al, 2020)	activation
6	rsbR	C 03021 Transcription machinery [BR:ko03021]	D WP_073203804.1; K17763 rsbR; rsbT co-antagonist protein RsbR	WP_073203804.1	RS02080	0.860417	no-diff	1460.3	804.321	2.12041	Up	1525.71	357.059	GAF domain-containing protein	regulator	Antagonist of RsbT and inhibit the activity of SigB in B. subtilis (Rodriguez Ayala et al, 2020)	inhibition
7	rsbR	C 03021 Transcription machinery [BR:ko03021]	D WP_044334717.1; K17763 rsbR; rsbT co-antagonist protein RsbR	WP_044334717.1	RS02510	0.578496	no-diff	2963.42	1984.2	2.11598	Up	2215.83	504.777	STAS domain-containing protein	regulator
8	rsbR	C 03021 Transcription machinery [BR:ko03021]	D WP_056767330.1; K17763 rsbR; rsbT co-antagonist protein RsbR	WP_056767330.1	RS12190	1.05945	Up	7029.07	3372.46	-1.84369	Down	258.442	925.529	STAS domain-containing protein	regulator
9	ctc	C 03010 Ribosome [PATH:ko03010]	D WP_073203444.1; K02897 ctc, RP-L25, rplY; large subunit ribosomal protein L25	WP_073203444.1	RS00335	-1.18183	Down	25477.8	57800.6	2.88397	Up	20157.8	2727.69	50S ribosomal protein L25/general stress protein Ctc		The ctc gene encodes a general stress protein (similar to a ribosomal protein) and is the prototypic member of the SigB regulon. The expression of ctc is activated by Mn(II) in B. subtilis (Guedon et al, 2003)	activated by SigB
10	spo0E	C 99978 Cell growth	D WP_024424676.1; K06376 spo0E; stage 0 sporulation regulatory protein	WP_024424676.1	RS06535	1.09398	Up	777.168	363.949	0.116678	no-diff	1557.46	1436.46	aspartyl-phosphate phosphatase Spo0E family protein	regulator	spo0E specifically dephosphorylate Spo0A-P. Spo0A, AbrB, and Spo0E inhibiting each other in the process o initiation of sporulation (Schultz, 2016)	inhibition
11	spo0E		spo0E	WP_029707539.1	RS05280	0.598534	no-diff	1014.9	670.262	-2.98935	Down	28.0552	226.997	aspartyl-phosphate phosphatase Spo0E family protein
12	spo0E		spo0E	WP_008343814.1	RS09575	0.758496	no-diff	2519.96	1489.1	1.39634	Up	336.735	126.245	aspartyl-phosphate phosphatase Spo0E family protein
